# Supplementary material for: Optimal Allocation of the Limited COVID-19 Vaccine Supply in South Korea
Source: PubMed Central journal article supplement (PMC7914460; doi:10.3390/jcm10040591), 2021-02-04
Supplement: jcm-10-00591-s001.pdf [file jcm-10-00591-s001.pdf]

**Table S1.** Contact matrix for South Korea [1,2].

|          |          |          |          |          |          |          |          |          |          |          |          |          |          |          |          |
|----------|----------|----------|----------|----------|----------|----------|----------|----------|----------|----------|----------|----------|----------|----------|----------|
| 1.323032 | 0.511391 | 0.259967 | 0.148988 | 0.207897 | 0.434599 | 0.722043 | 0.73318  | 0.453782 | 0.223322 | 0.250269 | 0.289737 | 0.224733 | 0.160106 | 0.086703 | 0.118455 |
| 0.511391 | 4.543004 | 1.296112 | 0.291484 | 0.160489 | 0.306496 | 0.786627 | 0.946801 | 0.858648 | 0.461342 | 0.455997 | 0.430193 | 0.22795  | 0.218478 | 0.180238 | 0.148089 |
| 0.259967 | 1.296112 | 9.382169 | 2.154623 | 0.288266 | 0.222286 | 0.572666 | 0.848998 | 1.147851 | 0.69275  | 0.775687 | 0.42713  | 0.169306 | 0.188677 | 0.20818  | 0.224877 |
| 0.148988 | 0.291484 | 2.154623 | 12.46826 | 1.843834 | 0.725586 | 0.535118 | 0.718495 | 1.186661 | 1.463987 | 1.142457 | 0.595319 | 0.271671 | 0.116446 | 0.190762 | 0.178754 |
| 0.207897 | 0.160489 | 0.288266 | 1.843834 | 3.908624 | 1.756962 | 1.057056 | 0.854554 | 0.904312 | 1.043929 | 1.017573 | 0.605064 | 0.276449 | 0.140007 | 0.110589 | 0.088538 |
| 0.434599 | 0.306496 | 0.222286 | 0.725586 | 1.756962 | 3.324036 | 1.729974 | 1.321534 | 1.170599 | 0.977348 | 1.208761 | 0.931825 | 0.445202 | 0.203659 | 0.157439 | 0.093461 |
| 0.722043 | 0.786627 | 0.572666 | 0.535118 | 1.057056 | 1.729974 | 3.148143 | 1.850105 | 1.541383 | 1.151196 | 1.088541 | 1.010244 | 0.596358 | 0.358766 | 0.195683 | 0.168644 |
| 0.73318  | 0.946801 | 0.848998 | 0.718495 | 0.854554 | 1.321534 | 1.850105 | 3.190067 | 2.027397 | 1.363772 | 1.102881 | 0.796407 | 0.605342 | 0.383384 | 0.32024  | 0.190943 |
| 0.453782 | 0.858648 | 1.147851 | 1.186661 | 0.904312 | 1.170599 | 1.541383 | 2.027397 | 3.131828 | 1.641143 | 1.462379 | 0.849986 | 0.515796 | 0.34596  | 0.384166 | 0.222199 |
| 0.223322 | 0.461342 | 0.69275  | 1.463987 | 1.043929 | 0.977348 | 1.151196 | 1.363772 | 1.641143 | 2.274281 | 1.564004 | 0.794123 | 0.428194 | 0.212035 | 0.287178 | 0.278001 |
| 0.250269 | 0.455997 | 0.775687 | 1.142457 | 1.017573 | 1.208761 | 1.088541 | 1.102881 | 1.462379 | 1.564004 | 2.24648  | 1.146448 | 0.47515  | 0.253375 | 0.253019 | 0.282998 |
| 0.289737 | 0.430193 | 0.42713  | 0.595319 | 0.605064 | 0.931825 | 1.010244 | 0.796407 | 0.849986 | 0.794123 | 1.146448 | 1.643023 | 0.618193 | 0.324085 | 0.212747 | 0.177926 |
| 0.224733 | 0.22795  | 0.169306 | 0.271671 | 0.276449 | 0.445202 | 0.596358 | 0.605342 | 0.515796 | 0.428194 | 0.47515  | 0.618193 | 0.924387 | 0.363836 | 0.335684 | 0.125091 |
| 0.160106 | 0.218478 | 0.188677 | 0.116446 | 0.140007 | 0.203659 | 0.358766 | 0.383384 | 0.34596  | 0.212035 | 0.253375 | 0.324085 | 0.363836 | 0.812451 | 0.350153 | 0.166004 |
| 0.086703 | 0.180238 | 0.20818  | 0.190762 | 0.110589 | 0.157439 | 0.195683 | 0.32024  | 0.384166 | 0.287178 | 0.253019 | 0.212747 | 0.335684 | 0.350153 | 0.767796 | 0.226417 |
| 0.118455 | 0.148089 | 0.224877 | 0.178754 | 0.088538 | 0.093461 | 0.168644 | 0.190943 | 0.222199 | 0.278001 | 0.282998 | 0.177926 | 0.125091 | 0.166004 | 0.226417 | 0.369968 |

Each entry in the contact matrix ( $c_{kj}$ ) corresponds to the number of individuals of age-group  $j$  that a person in age group  $i$  comes into contact with.

**Table S2.** Baseline parameter values and description.

| Parameter    | Description                                                                                           | Baseline values                                                                                                                                                                                                                                                                                                                                                           | Refs    |
|--------------|-------------------------------------------------------------------------------------------------------|---------------------------------------------------------------------------------------------------------------------------------------------------------------------------------------------------------------------------------------------------------------------------------------------------------------------------------------------------------------------------|---------|
| $\beta_k$    | Probability of a successful transmission after contact with an infectious individual in age group $k$ | 0.40 ( $k = 1$ and $2$ ); 0.38 ( $k = 3$ and $4$ ); 0.79 ( $k = 5$ and $6$ ); 0.86 ( $k=7$ and $8$ ); 0.80 ( $k = 9$ and $10$ ); 0.82 ( $k = 11$ and $12$ ); 0.88 ( $k = 13$ and $14$ ); 0.74 ( $k = 15$ and $16$ ).                                                                                                                                                      | Fitted  |
| $N_k$        | Number of people in age group $k$                                                                     | $N_1 = 1.70 * 10^6, N_2 = 2.28 * 10^6,$<br>$N_3 = 2.28 * 10^6, N_4 = 2.48 * 10^6,$<br>$N_5 = 3.23 * 10^6, N_6 = 3.46 * 10^6,$<br>$N_7 = 3.11 * 10^6, N_8 = 3.72 * 10^6,$<br>$N_9 = 3.84 * 10^6, N_{10} = 4.35 * 10^6,$<br>$N_{11} = 4.34 * 10^6, N_{12} = 4.18 * 10^6,$<br>$N_{13} = 3.81 * 10^6, N_{14} = 2.67 * 10^6,$<br>$N_{15} = 2.00 * 10^6, N_{16} = 3.55 * 10^6.$ | [3]     |
| $m$          | Relative infectiousness among symptomatic individuals compared to asymptomatic individuals            | 1.3                                                                                                                                                                                                                                                                                                                                                                       | [4]     |
| $1/\sigma$   | Mean duration of exposure to infectiousness                                                           | 3 days                                                                                                                                                                                                                                                                                                                                                                    | [5]     |
| $a$          | Proportion of infections that become asymptomatic                                                     | 0.35                                                                                                                                                                                                                                                                                                                                                                      | [6,7]   |
| $1/\gamma_A$ | Infectious period of asymptotically infected individuals                                              | 5 days                                                                                                                                                                                                                                                                                                                                                                    | [8,9]   |
| $1/\gamma_P$ | Infectious period of symptomatically infected individuals                                             | 5 days                                                                                                                                                                                                                                                                                                                                                                    | [8,9]   |
| $\delta$     | Vaccine efficacy                                                                                      | 0.7                                                                                                                                                                                                                                                                                                                                                                       | [10,11] |

**Table S3.** Years of life lost in age groups due to death [12].

| <b>Age group (<i>k</i>)</b> | <b>Ages (years)</b> | <b>Expectation of life (years)</b> |
|-----------------------------|---------------------|------------------------------------|
| 1                           | <4                  | 82.7                               |
| 2                           | 5–9                 | 78.6                               |
| 3                           | 10–14               | 73.6                               |
| 4                           | 15–19               | 68.7                               |
| 5                           | 20–24               | 63.7                               |
| 6                           | 25–29               | 58.8                               |
| 7                           | 30–34               | 54.0                               |
| 8                           | 35–39               | 49.1                               |
| 9                           | 40–44               | 44.3                               |
| 10                          | 45–49               | 39.5                               |
| 11                          | 50–54               | 34.8                               |
| 12                          | 55–59               | 30.2                               |
| 13                          | 60–64               | 25.8                               |
| 14                          | 65–69               | 21.4                               |
| 15                          | 70–74               | 17.2                               |
| 16                          | 75+                 | 10.4                               |

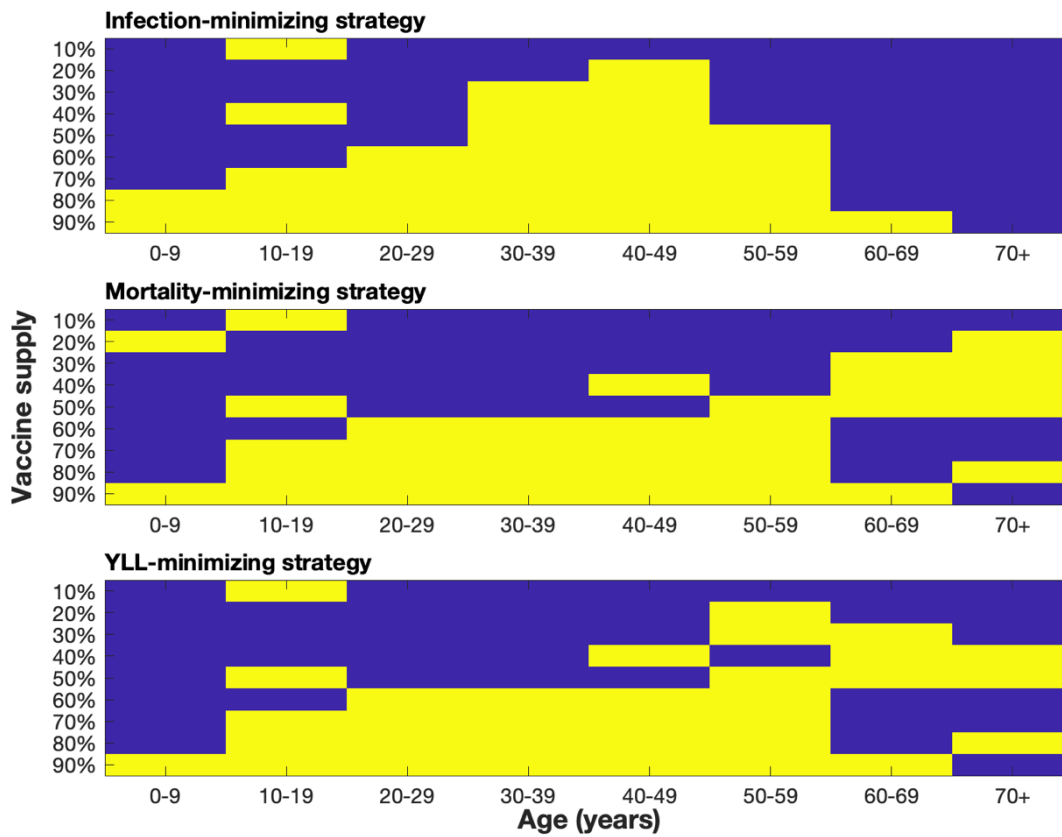

**Figure S1.** The proportion of individuals vaccinated from each age group (x-axis) to minimize three healthcare measures (i.e., total number of infections, total number of deaths, and the years of life lost) under various vaccine coverage levels (y-axis) when only none (colored in blue) or complete (colored in yellow) vaccine coverage level is allowed for each age group. Vaccine efficacy of 70% and a basic reproduction number ( $R_0$ ) of 2.6 are assumed.

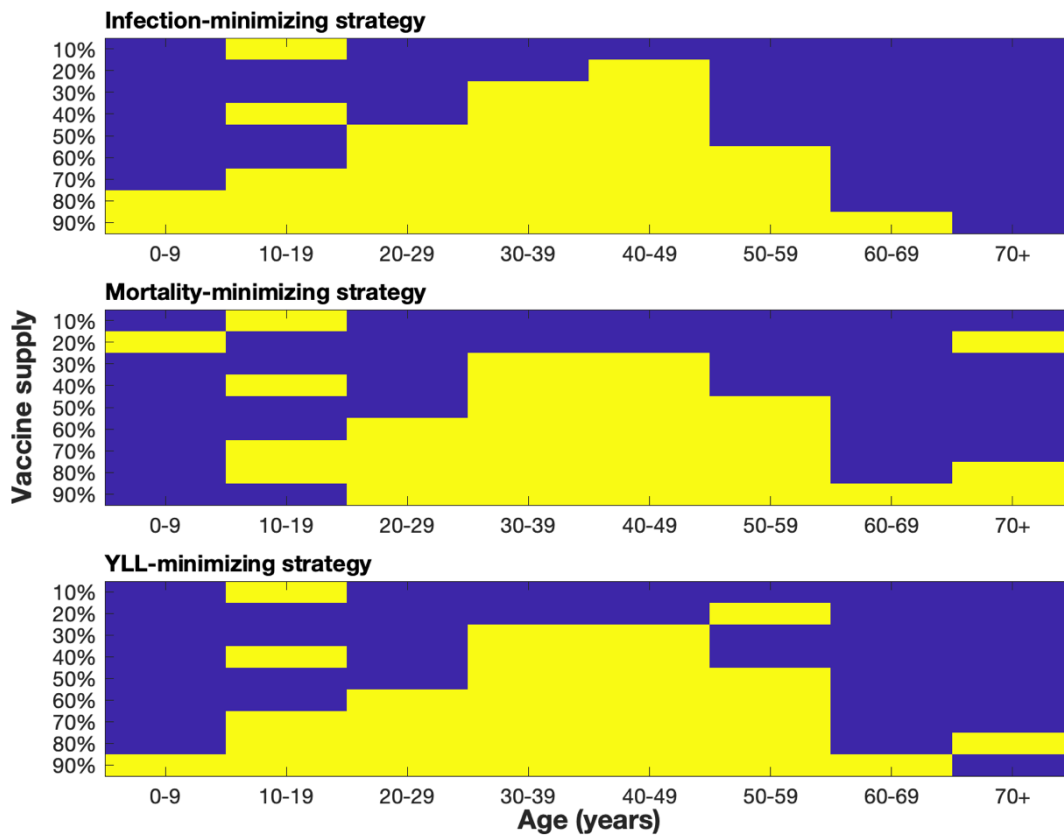

**Figure S2.** The proportion of individuals vaccinated from each age group (x-axis) to minimize three healthcare measures (i.e., total number of infections, total number of deaths, and the years of life lost) under various vaccine coverage levels (y-axis) when only none (colored in blue) or complete (colored in yellow) vaccine coverage level is allowed for each age group. Vaccine efficacy of 70% and a basic reproduction number ( $R_0$ ) of 1.5 are assumed.
